# Supplementary material for: The Impact of Emergency Department Arrival Time on Door-to-Balloon Time in Patients with ST-Segment Elevation Myocardial Infarction Receiving Primary Percutaneous Coronary Intervention
Source: MDPI journal article supplement (doi:10.3390/jcm12062392), 2023-03-20
Supplement: s1 [file s1]

Supplementary Table S1. Sensitivity analysis for the predictors associated with different time intervals during door-to-balloon time in ED STEMI patients

|              | Door-to-Balloon Time<br>> 90 min    | Door-to-ECG > 10 min                | ECG-to-Consultation<br>> 10 min     | Consultation-to-Activation<br>> 10 min | Activation-to-Cath Lab-<br>Arrival > 30 min | Cath Lab-Arrival-to-<br>Balloon Time > 30 min |
|--------------|-------------------------------------|-------------------------------------|-------------------------------------|----------------------------------------|---------------------------------------------|-----------------------------------------------|
| Parameters   | aOR ( 95% CI )<br><i>P</i><br>value    | aOR ( 95% CI )<br><i>P</i><br>value         | aOR ( 95% CI )<br><i>P</i><br>value           |
| Age          |                                     | 1.03 ( 1.00–1.06 ) 0.030            |                                     |                                        |                                             |                                               |
| Female sex   | 2.83 ( 1.56–5.13 ) <0.001           | 3.23 ( 1.63–6.39 ) <0.001           |                                     |                                        |                                             |                                               |
| Weekend      |                                     |                                     |                                     |                                        | 2.08 ( 1.40–3.07 ) <0.001                   |                                               |
| Year         |                                     |                                     |                                     |                                        |                                             |                                               |
| 2013         | Reference                           |                                     | Reference                           | Reference                              | Reference                                   | Reference                                     |
| 2014         | 1.32 ( 0.56–3.12 ) 0.526            |                                     | 0.54 ( 0.26–1.12 ) 0.096            | 3.29 ( 0.66–16.37 ) 0.145              | 2.20 ( 0.78–6.20 ) 0.137                    | 1.55 ( 0.79–3.05 ) 0.200                      |
| 2015         | 0.60 ( 0.22–1.65 ) 0.320            |                                     | 0.77 ( 0.37–1.59 ) 0.475            | 4.17 ( 0.84–20.83 ) 0.082              | 2.83 ( 0.98–8.15 ) 0.054                    | 1.85 ( 0.92–3.73 ) 0.084                      |
| 2016         | 0.41 ( 0.14–1.19 ) 0.102            |                                     | 0.37 ( 0.16–0.81 ) 0.014            | 4.05 ( 0.83–19.72 ) 0.083              | 3.26 ( 1.18–8.98 ) 0.023                    | 0.75 ( 0.36–1.56 ) 0.438                      |
| 2017         | 0.49 ( 0.17–1.37 ) 0.174            |                                     | 0.52 ( 0.24–1.09 ) 0.081            | 6.25 ( 1.35–28.98 ) 0.019              | 2.70 ( 0.97–7.49 ) 0.057                    | 0.61 ( 0.28–1.32 ) 0.208                      |
| 2018         | 0.17 ( 0.04–0.65 ) 0.010            |                                     | 0.26 ( 0.11–0.63 ) 0.003            | 2.97 ( 0.58–15.22 ) 0.191              | 3.81 ( 1.39–10.45 ) 0.009                   | 0.65 ( 0.30–1.38 ) 0.257                      |
| 2019         | 0.58 ( 0.23–1.47 ) 0.249            |                                     | 0.92 ( 0.47–1.80 ) 0.804            | 6.42 ( 1.41–29.29 ) 0.016              | 4.69 ( 1.75–12.61 ) 0.002                   | 0.67 ( 0.22–1.02 ) 0.055                      |
| 2020         | 0.28 ( 0.09–0.90 ) 0.032            |                                     | 0.57 ( 0.27–1.20 ) 0.139            | 8.19 ( 1.79–37.41 ) 0.007              | 10.68 ( 4.00–28.50 ) <0.001                 | 0.37 ( 0.16–0.88 ) 0.024                      |
| 2021         | 0.42 ( 0.14–1.30 ) 0.131            |                                     | 0.83 ( 0.40–1.72 ) 0.613            | 8.411 ( 1.82–38.83 ) 0.006             | 17.36 ( 6.40–47.07 ) <0.001                 | 0.59 ( 0.27–1.32 ) 0.201                      |
| Triage level |                                     |                                     |                                     |                                        |                                             |                                               |
| 1            | Reference                           | Reference                           |                                     |                                        |                                             |                                               |
| 2            | 0.72 ( 0.34–1.56 ) 0.407            | 0.44 ( 0.19–0.99 ) 0.049            |                                     |                                        |                                             |                                               |

|                      |                          |                          |                          |                          |                            |                          |
|----------------------|--------------------------|--------------------------|--------------------------|--------------------------|----------------------------|--------------------------|
| <b>3</b>             | 3.20 ( 1.23–8.34 ) 0.017 | 3.05 ( 1.17–7.95 ) 0.023 |                          |                          |                            |                          |
| <b>Lateral wall</b>  |                          |                          |                          |                          |                            |                          |
| <b>STEMI</b>         |                          |                          |                          |                          |                            |                          |
| <b>ED visit time</b> |                          |                          |                          |                          |                            |                          |
| <b>08:00–15:59</b>   | Reference                | Reference                | Reference                | Reference                | Reference                  | Reference                |
| <b>16:00–23:59</b>   | 1.71 ( 0.92–3.16 ) 0.088 | 1.02 ( 0.51–2.03 ) 0.956 | 0.35 ( 0.21–0.60 ) 0.477 | 0.88 ( 0.51–1.51 ) 0.639 | 3.84 ( 2.44–6.04 ) <0.001  | 0.89 ( 0.60–1.34 ) 0.578 |
| <b>00:00–07:59</b>   | 2.95 ( 1.51–5.78 ) 0.002 | 1.38 ( 0.63–3.01 ) 0.425 | 1.17 ( 0.77–1.77 ) 0.028 | 1.45 ( 0.80–2.61 ) 0.217 | 6.45 ( 3.84–10.82 ) <0.001 | 0.88 ( 0.53–1.45 ) 0.613 |

OR: odds ratio; aOR: adjusted odds ratio; CI: confidence interval; ED: emergency department; STEMI: ST-segment elevation myocardial infarction.
